# Supplementary material for: New Approach to Determine the Activity Concentration Index in Cements, Fly Ashes, and Slags on the Basis of Their Chemical Composition
Source: MDPI journal article supplement (doi:10.3390/ma16072677), 2023-03-28
Supplement: s1 [file s1]

## Annex 1

**Table S1.** Type and chemical composition (wt. %) of the analysed Cements.

|            | Type                 | SiO <sub>2</sub> | CaO   | Al <sub>2</sub> O <sub>3</sub> | Fe <sub>2</sub> O <sub>3</sub> | MgO  | MnO  | Na <sub>2</sub> O | K <sub>2</sub> O | TiO <sub>2</sub> | SO <sub>3</sub> | Other Oxides | Lol* |
|------------|----------------------|------------------|-------|--------------------------------|--------------------------------|------|------|-------------------|------------------|------------------|-----------------|--------------|------|
| <b>C17</b> | Belitic cement 30%FA | 37.46            | 28.56 | 14.31                          | 5.82                           | 2.00 | 0.05 | 1.29              | 1.74             | 0.85             | 3.47            | 0.36         | 3.31 |
| <b>C18</b> | CEM I 52.5 R         | 20.00            | 64.08 | 4.37                           | 2.53                           | 1.87 | 0.09 | 0.13              | 0.77             | 0.21             | 2.89            | 0.45         | 2.78 |
| <b>C19</b> | CEM I                | 37.93            | 28.40 | 14.48                          | 5.77                           | 1.99 | 0.06 | 1.31              | 1.74             | 0.86             | 3.52            | 0.36         | 3.30 |
| <b>C20</b> | CEM I 42.5R          | 19.97            | 56.74 | 6.16                           | 3.21                           | 1.21 | 0.07 | 0.33              | 0.86             | 0.25             | 3.75            | 0.42         | 6.08 |
| <b>C21</b> | CEM I 52.5 R         | 19.63            | 64.37 | 5.66                           | 2.43                           | 0.86 | 0.06 | 0.04              | 0.64             | 0.23             | 3.59            | 0.23         | 3.05 |
| <b>C22</b> | CAC                  | 4.53             | 37.34 | 38.88                          | 12.46                          | 0.63 | -    | 0.03              | 0.13             | 1.65             | -               | 0.24         | 0.25 |
| <b>C23</b> | CEM I 42.5 R         | 19.47            | 63.83 | 5.73                           | 2.68                           | 0.90 | 0.05 | 0.05              | 0.63             | 0.22             | 3.15            | 0.17         | 3.57 |
| <b>C24</b> | CEM I 52-5 N-SR      | 20.55            | 63.66 | 3.84                           | 4.20                           | 0.75 | 0.16 | 0.01              | 0.58             | 0.18             | 3.06            | 0.19         | 3.32 |
| <b>C25</b> | CEM I 42.5 R         | 19.84            | 63.78 | 5.38                           | 2.43                           | 1.48 | 0.07 | 0.04              | 0.70             | 0.24             | 3.33            | 0.26         | 2.78 |
| <b>C26</b> | CEM I 52.5R R-SR     | 20.59            | 64.41 | 3.72                           | 3.23                           | 1.50 | -    | 0.10              | 0.60             | 0.21             | 3.03            | 0.43         | 3.01 |
| <b>C27</b> | CAC                  | 4.40             | 39.43 | 37.9                           | 14.93                          | 0.76 | 0.19 | -                 | 0.09             | 1.80             | 0.02            | 0.32         | 0.68 |

\*Lol: Lost on Ignition

**Table S2.** Type and chemical composition (wt. %) of the analysed Fly Ashes.

|             | Type*       | SiO <sub>2</sub> | CaO   | Al <sub>2</sub> O <sub>3</sub> | Fe <sub>2</sub> O <sub>3</sub> | MgO  | MnO  | Na <sub>2</sub> O | K <sub>2</sub> O | TiO <sub>2</sub> | SO <sub>3</sub> | Other Oxides | Lol** |
|-------------|-------------|------------------|-------|--------------------------------|--------------------------------|------|------|-------------------|------------------|------------------|-----------------|--------------|-------|
| <b>FA12</b> | F           | 51.80            | 2.69  | 25.30                          | 13.43                          | 0.91 | 0.04 | 0.45              | 2.46             | 0.81             | -               | 0.07         | 1.72  |
| <b>FA13</b> | F           | 53.90            | 5.32  | 26.00                          | 6.01                           | 1.73 | -    | 0.36              | 2.38             | 1.30             | 0.45            | 0.69         | 1.68  |
| <b>FA14</b> | F           | 56.97            | 9.67  | 18.80                          | 4.10                           | 1.39 | 0.12 | 1.66              | 3.00             | 0.80             | 0.45            | 1.14         | 1.93  |
| <b>FA15</b> | F           | 55.96            | 10.55 | 18.60                          | 4.25                           | 1.50 | 0.12 | 1.40              | 3.03             | 0.75             | 0.47            | 1.05         | 2.31  |
| <b>FA16</b> | F           | 45.58            | 9.17  | 32.25                          | 4.39                           | 0.76 | 0.10 | 0.98              | 1.17             | 1.16             | 0.70            | 0.44         | 3.30  |
| <b>FA17</b> | F           | 44.62            | 8.24  | 33.05                          | 4.95                           | 0.84 | 0.10 | 0.96              | 1.23             | 1.30             | 0.64            | 0.66         | 3.42  |
| <b>FA18</b> | F           | 42.71            | 2.21  | 48.86                          | 1.49                           | -    | -    | -                 | 0.34             | 1.64             | 0.14            | 0.37         | 2.25  |
| <b>FA19</b> | F           | 54.49            | 1.37  | 29.55                          | 5.80                           | 1.15 | -    | -                 | 2.75             | 1.58             | -               | 0.47         | 2.84  |
| <b>FA20</b> | F           | 56.12            | 1.03  | 29.29                          | 5.10                           | 0.79 | -    | -                 | 2.42             | 1.58             | -               | 0.46         | 2.61  |
| <b>FA21</b> | F           | 41.55            | 6.37  | 22.97                          | 23.26                          | 0.70 | 0.06 | 0.36              | 1.33             | 0.95             | 0.75            | 0.27         | 1.42  |
| <b>FA22</b> | Landfill FA | 23.95            | 21.84 | 10.08                          | 15.41                          | 6.60 | 0.18 | 0.36              | 0.58             | 0.76             | 1.56            | 0.78         | 17.88 |
| <b>FA23</b> | F           | 59.04            | 2.01  | 22.50                          | 4.32                           | 0.87 | 0.02 | 0.85              | 1.30             | 0.84             | 0.17            | 0.09         | 2.32  |
| <b>FA24</b> | F           | 52.77            | 6.51  | 18.10                          | 7.14                           | 2.71 | 0.06 | 1.13              | 1.94             | 0.83             | 0.47            | 0.41         | 7.93  |
| <b>FA25</b> | F           | 51.47            | 2.38  | 25.61                          | 14.42                          | 1.01 | 0.04 | -                 | 2.47             | 0.80             | -               | 0.23         | 1.57  |
| <b>FA26</b> | F           | 51.94            | 4.37  | 25.05                          | 6.38                           | 1.89 | 0.06 | 1.24              | 2.12             | 1.16             | 0.11            | 1.69         | 3.87  |

\*According to ASTM C618 \*\*Lol: Lost on Ignition

**Table S3.** Type and chemical composition (wt. %) of the analysed Slags.

|            | Type                        | SiO <sub>2</sub> | CaO   | Al <sub>2</sub> O <sub>3</sub> | Fe <sub>2</sub> O <sub>3</sub> | MgO   | MnO  | Na <sub>2</sub> O | K <sub>2</sub> O | TiO <sub>2</sub> | SO <sub>3</sub> | ZnO  | Other Oxides | LoI*  |
|------------|-----------------------------|------------------|-------|--------------------------------|--------------------------------|-------|------|-------------------|------------------|------------------|-----------------|------|--------------|-------|
| <b>S6</b>  | Blast furnace Vitreous Slag | 32.32            | 45.70 | 9.59                           | 0.54                           | 7.13  | 0.17 | 0.32              | 0.46             | 0.94             | 1.59            | -    | 0.31         | 0.95  |
| <b>S7</b>  | Blast furnace Vitreous Slag | 24.05            | 28.42 | 9.97                           | 1.60                           | 1.38  | 1.41 | -                 | 0.29             | 0.29             | 1.53            | 0.01 | 0.28         | 30.78 |
| <b>S8</b>  | Blast furnace Vitreous Slag | 34.36            | 34.13 | 9.97                           | 2.19                           | 5.65  | 0.16 | 1.54              | 0.79             | 0.42             | 2.24            | -    | 0.21         | 8.35  |
| <b>S9</b>  | Nickel Slag                 | 52.92            | 0.98  | 2.98                           | 20.39                          | 20.60 | 0.44 | -                 | -                | -                | 0.10            | 0.02 | 1.38         | 0.19  |
| <b>S10</b> | Blast furnace Vitreous Slag | 36.15            | 18.22 | 15.10                          | 18.67                          | 3.69  | 0.70 | 0.61              | 1.11             | 0.75             | 0.53            | 1.29 | 1.95         | 2.57  |
| <b>S11</b> | Blast furnace Vitreous Slag | 16.90            | 46.39 | 5.55                           | 2.06                           | 15.80 | 0.52 | -                 | -                | 0.22             | 1.77            | 0.02 | 0.17         | 10.58 |
| <b>S12</b> | Blast furnace Vitreous Slag | 33.79            | 38.78 | 10.30                          | 0.63                           | 10.50 | 0.94 | -                 | 0.31             | 1.34             | 3.08            | -    | 0.12         | 0.70  |
| <b>S13</b> | Blast furnace Vitreous Slag | 34.52            | 42.21 | 10.50                          | 0.67                           | 8.30  | 0.17 | -                 | 0.29             | 0.85             | 1.74            | -    | 0.13         | 0.60  |
| <b>S14</b> | Blast furnace Vitreous Slag | 38.23            | 35.30 | 12.00                          | 0.79                           | 7.23  | 1.41 | -                 | 0.66             | 1.09             | 0.80            | -    | 0.16         | 2.29  |
| <b>S15</b> | Blast furnace Vitreous Slag | 34.96            | 41.12 | 10.50                          | 0.45                           | 8.90  | 0.16 | -                 | 0.25             | 0.47             | 1.28            | -    | 0.10         | 1.75  |
| <b>S16</b> | Blast furnace Vitreous Slag | 34.95            | 42.47 | 12.00                          | 0.49                           | 7.73  | 0.17 | -                 | 0.33             | 0.65             | 0.86            | -    | 0.15         | 0.17  |
| <b>S17</b> | Steel slag                  | 12.70            | 39.06 | 16.10                          | 18.52                          | 3.99  | 3.71 | -                 | 0.11             | 0.75             | 0.29            | -    | 1.16         | 3.59  |

\*LoI: Lost on Ignition

**Table S4.** Activity concentration for the gamma emitters in the naturally occurring  $^{238}\text{U}$ ,  $^{235}\text{U}$ ,  $^{232}\text{Th}$  and  $^{40}\text{K}$  series in cements.

| Series  |   | $^{238}\text{U}$ Radiative Serie |                   |                   |                   |                   | $^{235}\text{U}$ | $^{232}\text{Th}$ Radiative Serie |                   |                   | $^{40}\text{K}$ |
|---------|---|----------------------------------|-------------------|-------------------|-------------------|-------------------|------------------|-----------------------------------|-------------------|-------------------|-----------------|
| Cements |   | $^{234}\text{Th}$                | $^{226}\text{Ra}$ | $^{214}\text{Pb}$ | $^{214}\text{Bi}$ | $^{210}\text{Pb}$ |                  | $^{228}\text{Ac}$                 | $^{212}\text{Pb}$ | $^{208}\text{Tl}$ |                 |
| C17     | A | 79.2 ± 9.3                       | 70 ± 10           | 72.0 ± 5.5        | 64.8 ± 2.1        | 83 ± 13           | < 3.5            | 42.4 ± 1.6                        | 46.1 ± 3.7        | 18.6 ± 1.2        | 338 ± 15        |
|         | B | 74.5 ± 9.0                       | 84 ± 11           | 81.3 ± 6.3        | 75.5 ± 2.8        | 85 ± 13           | < 3.0            | 49.4 ± 1.7                        | 51.8 ± 4.3        | 20.8 ± 1.4        | 402 ± 19        |
| C18     | A | 32.2 ± 5.7                       | 25.2 ± 7.8        | 27.5 ± 2.2        | 26.3 ± 1.2        | 28.9 ± 6.9        | < 4.7            | 20.0 ± 1.0                        | 20.0 ± 1.7        | 8.51 ± 0.64       | 216 ± 11        |
|         | B | 26.0 ± 4.1                       | 24.2 ± 4.9        | 23.6 ± 1.8        | 22.27 ± 0.85      | 24.3 ± 4.9        | < 2.1            | 16.03 ± 0.70                      | 17.7 ± 1.4        | 7.55 ± 0.50       | 176.3 ± 8.2     |
| C19     | A | 81.1 ± 9.5                       | 76 ± 11           | 79.6 ± 6.2        | 73.3 ± 2.9        | 89 ± 14           | 3.98 ± 0.51      | 48.4 ± 2.1                        | 50.7 ± 4.2        | 20.9 ± 1.4        | 402 ± 19        |
|         | B | 81 ± 10                          | 76 ± 12           | 81.6 ± 6.3        | 76.1 ± 2.7        | 87 ± 14           | < 6.1            | 50.0 ± 2.0                        | 52.3 ± 4.3        | 20.9 ± 1.4        | 417 ± 19        |
| C20     | A | 41.7 ± 5.8                       | 34.3 ± 6.2        | 32.7 ± 2.5        | 30.2 ± 1.1        | 32.7 ± 5.9        | < 2.5            | 16.27 ± 0.71                      | 17.9 ± 1.5        | 7.81 ± 0.52       | 183.2 ± 8.5     |
|         | B | 43.5 ± 6.4                       | 35.4 ± 7.0        | 36.5 ± 2.8        | 32.3 ± 1.7        | 37.4 ± 6.9        | < 3.2            | 19.1 ± 1.0                        | 19.6 ± 1.7        | 8.06 ± 0.69       | 216 ± 11        |
| C21     | A | 28.7 ± 6.0                       | < 17.1            | 18.1 ± 1.6        | 15.6 ± 1.0        | 28.4 ± 7.7        | < 5.7            | 19.4 ± 1.2                        | 21.5 ± 1.8        | 9.02 ± 0.73       | 205 ± 11        |
|         | B | 21.3 ± 4.8                       | 18.7 ± 5.7        | 15.3 ± 1.2        | 13.02 ± 0.69      | 18.1 ± 4.9        | < 2.8            | 18.29 ± 0.86                      | 19.8 ± 1.6        | 7.72 ± 0.53       | 198 ± 10        |
| C22     | A | 70.3 ± 8.3                       | 93 ± 11           | 87.0 ± 6.6        | 82.6 ± 2.6        | 24.7 ± 5.4        | < 3.9            | 128.3 ± 4.4                       | 133 ± 11          | 55.8 ± 3.4        | < 0.0           |
|         | B | 79 ± 10                          | 91 ± 13           | 90.7 ± 6.9        | 85.3 ± 2.7        | 29.3 ± 7.2        | < 3.8            | 130.9 ± 4.4                       | 135 ± 11          | 56.2 ± 3.5        | < 8.9           |
| C23     | A | 18.4 ± 2.7                       | 17.2 ± 3.4        | 17.3 ± 1.3        | 14.15 ± 0.55      | 10.4 ± 2.6        | < 1.6            | 18.28 ± 0.70                      | 19.9 ± 1.6        | 7.93 ± 0.50       | 162.2 ± 7.3     |
|         | B | 19.4 ± 3.7                       | 21.2 ± 4.7        | 17.0 ± 1.3        | 15.03 ± 0.77      | < 9.2             | < 2.6            | 21.6 ± 1.4                        | 21.8 ± 1.8        | 9.41 ± 0.74       | 187.0 ± 9.5     |
| C24     | A | 19.2 ± 3.9                       | 18.1 ± 7.3        | 17.2 ± 1.4        | 14.67 ± 0.92      | 17.4 ± 5.3        | < 4.5            | 16.05 ± 0.91                      | 16.1 ± 1.3        | 5.88 ± 0.52       | 142.9 ± 7.7     |
|         | B | 24.0 ± 4.1                       | 19.9 ± 5.0        | 16.6 ± 1.5        | 16.18 ± 0.89      | 23.3 ± 5.3        | < 2.4            | 16.1 ± 1.1                        | 16.6 ± 1.4        | 7.26 ± 0.58       | 150.8 ± 7.8     |
| C25     | A | 31.1 ± 4.8                       | 36.2 ± 5.9        | 31.9 ± 2.6        | 30.2 ± 1.4        | 26.7 ± 5.6        | < 2.7            | 22.0 ± 1.3                        | 23.3 ± 2.0        | 8.52 ± 0.72       | 177.0 ± 9.1     |
|         | B | 31.7 ± 4.9                       | 31.4 ± 6.0        | 26.0 ± 2.0        | 23.76 ± 0.92      | 23.6 ± 4.9        | < 2.5            | 19.08 ± 0.81                      | 21.2 ± 1.7        | 8.23 ± 0.54       | 149.1 ± 7.2     |
| C26     | A | 35.2 ± 4.8                       | 27.6 ± 5.3        | 30.2 ± 2.4        | 26.5 ± 1.3        | 34.5 ± 6.4        | < 2.4            | 14.8 ± 1.5                        | 14.5 ± 1.2        | 5.62 ± 0.47       | 146.1 ± 7.5     |
|         | B | 35.6 ± 5.6                       | 32.9 ± 7.7        | 28.2 ± 2.2        | 26.8 ± 1.2        | 28.7 ± 6.5        | < 4.1            | 11.53 ± 0.71                      | 14.1 ± 1.2        | 5.28 ± 0.44       | 134.4 ± 7.0     |
| C27     | A | 90 ± 11                          | 88 ± 12           | 89.0 ± 6.8        | 82.4 ± 2.8        | 62 ± 11           | < 4.1            | 128.0 ± 4.6                       | 136 ± 11          | 50.1 ± 3.1        | < 5.4           |
|         | B | 85 ± 11                          | 97 ± 14           | 91.2 ± 7.0        | 87.5 ± 2.9        | 59 ± 11           | < 5.3            | 131.0 ± 4.5                       | 97.3 ± 7.9        | 50.3 ± 3.1        | < 0.0           |

Uncertainties are expressed for a coverage factor of k=2.

**Table S5.** Activity concentration for the gamma emitters in the naturally occurring  $^{238}\text{U}$ ,  $^{235}\text{U}$ ,  $^{232}\text{Th}$  and  $^{40}\text{K}$  series in Fly Ashes.

| Series    |   | $^{238}\text{U}$ Radiative Serie |                   |                   |                   |                   | $^{235}\text{U}$ | $^{232}\text{Th}$ Radiative Serie |                   |                   | $^{40}\text{K}$ |
|-----------|---|----------------------------------|-------------------|-------------------|-------------------|-------------------|------------------|-----------------------------------|-------------------|-------------------|-----------------|
| Fly Ashes |   | $^{234}\text{Th}$                | $^{226}\text{Ra}$ | $^{214}\text{Pb}$ | $^{214}\text{Bi}$ | $^{210}\text{Pb}$ |                  | $^{228}\text{Ac}$                 | $^{212}\text{Pb}$ | $^{208}\text{Tl}$ |                 |
| FA12      | A | 120 ± 13                         | 112 ± 14          | 115.0 ± 8.8       | 106.5 ± 3.5       | 121 ± 18          | 5.2 ± 1.0        | 76.1 ± 2.9                        | 78.4 ± 6.4        | 29.1 ± 1.9        | 564 ± 25        |
|           | B | 80.0 ± 9.2                       | 90 ± 11           | 81.9 ± 6.2        | 76.3 ± 2.4        | 94 ± 14           | < 3.0            | 51.8 ± 1.9                        | 53.4 ± 4.3        | 20.2 ± 1.3        | 381 ± 17        |
| FA13      | A | 93 ± 10                          | 91 ± 11           | 92.7 ± 7.1        | 86.5 ± 2.6        | 102 ± 15          | < 2.8            | 58.7 ± 2.3                        | 60.6 ± 5.0        | 22.9 ± 1.5        | 444 ± 20        |
|           | B | 58.8 ± 8.1                       | 44 ± 10           | 56.4 ± 4.4        | 54.4 ± 2.0        | 54.5 ± 8.8        | < 5.4            | 54.2 ± 2.1                        | 57.5 ± 4.7        | 24.4 ± 1.6        | 665 ± 29        |
| FA14      | A | 54.1 ± 6.9                       | 50.0 ± 8.0        | 55.8 ± 4.3        | 50.0 ± 1.6        | 52.6 ± 8.3        | < 3.5            | 50.5 ± 1.8                        | 55.1 ± 4.5        | 22.7 ± 1.4        | 606 ± 26        |
|           | B | 47.2 ± 7.3                       | 66 ± 11           | 63.0 ± 4.9        | 59.7 ± 2.3        | 59 ± 10           | < 6.1            | 59.1 ± 2.3                        | 61.4 ± 5.0        | 25.8 ± 1.7        | 707 ± 31        |
| FA15      | A | 60.1 ± 8.0                       | 53.9 ± 9.0        | 59.6 ± 4.7        | 56.4 ± 2.3        | 49.4 ± 8.2        | < 3.8            | 58.1 ± 2.6                        | 60.1 ± 4.9        | 25.3 ± 1.7        | 699 ± 31        |
|           | B | 146 ± 18                         | 116 ± 20          | 136 ± 10          | 133.9 ± 4.5       | 142 ± 22          | < 9.0            | 162.2 ± 5.7                       | 171 ± 14          | 70.1 ± 4.4        | 115 ± 10        |
| FA16      | A | 141 ± 16                         | 99 ± 16           | 122.5 ± 9.3       | 111.8 ± 3.5       | 120 ± 18          | < 5.3            | 143.2 ± 4.9                       | 156 ± 13          | 63.4 ± 3.9        | 91.3 ± 6.8      |
|           | B | 167 ± 18                         | 144 ± 19          | 158 ± 12          | 148.0 ± 4.5       | 214 ± 31          | 6.0 ± 2.9        | 195.3 ± 6.8                       | 201 ± 16          | 84.3 ± 5.2        | 99.2 ± 8.1      |
| FA17      | A | 162 ± 18                         | 134 ± 20          | 164 ± 12          | 154.5 ± 4.7       | 210 ± 31          | < 6.7            | 196.0 ± 6.6                       | 206 ± 17          | 84.3 ± 5.2        | 95.7 ± 8.1      |
|           | B | 184 ± 20                         | 153 ± 20          | 165 ± 13          | 147.2 ± 4.3       | 149 ± 22          | 6.74 ± 0.94      | 225.9 ± 7.5                       | 242 ± 20          | 99.4 ± 6.1        | < 11.4          |
| FA18      | A | 191 ± 21                         | 172 ± 23          | 187 ± 14          | 175.4 ± 5.8       | 182 ± 27          | < 6.4            | 259 ± 11                          | 271 ± 22          | 113.7 ± 7.1       | < 10.0          |
|           | B | 130 ± 16                         | 147 ± 20          | 137 ± 10          | 129.0 ± 4.2       | 152 ± 23          | < 7.5            | 109.2 ± 3.9                       | 116.8 ± 9.5       | 49.5 ± 3.1        | 538 ± 25        |
| FA19      | A | 136 ± 15                         | 133 ± 16          | 141 ± 11          | 131.5 ± 4.1       | 141 ± 21          | 5.39 ± 0.75      | 110.2 ± 4.1                       | 116.2 ± 9.4       | 35.3 ± 2.2        | 533 ± 24        |
|           | B | 151 ± 17                         | 140 ± 19          | 160 ± 12          | 155.3 ± 4.7       | 158 ± 23          | < 4.5            | 120.3 ± 4.1                       | 126 ± 10          | 54.1 ± 3.4        | 487 ± 22        |
| FA20      | A | 157 ± 17                         | 151 ± 19          | 156 ± 12          | 145.4 ± 4.8       | 144 ± 21          | 6.7 ± 1.5        | 118.4 ± 4.5                       | 124 ± 10          | 37.6 ± 2.4        | 479 ± 22        |
|           | B | 157 ± 17                         | 137 ± 17          | 146 ± 11          | 135.6 ± 4.9       | 94 ± 14           | 5.60 ± 0.70      | 49.6 ± 1.7                        | 53.1 ± 4.3        | 21.6 ± 1.3        | 252 ± 11        |
| FA21      | A | 167 ± 18                         | 150 ± 19          | 161 ± 12          | 149.1 ± 4.7       | 106 ± 16          | 7.60 ± 0.92      | 56.4 ± 2.5                        | 60.2 ± 4.9        | 24.8 ± 1.7        | 234 ± 12        |
|           | B | 37.2 ± 5.5                       | 64.1 ± 8.6        | 50.1 ± 4.0        | 43.7 ± 1.7        | 51.7 ± 8.5        | < 3.7            | 42.7 ± 1.9                        | 43.9 ± 3.6        | 17.9 ± 1.3        | 89.9 ± 7.1      |
| FA22      | A | 42.7 ± 6.6                       | 48.2 ± 8.5        | 46.5 ± 3.6        | 42.6 ± 1.9        | 50.2 ± 8.4        | < 3.4            | 35.8 ± 1.4                        | 38.9 ± 3.2        | 16.1 ± 1.0        | 111.6 ± 5.8     |
|           | B | 120 ± 13                         | 115 ± 14          | 120.2 ± 9.2       | 110.8 ± 3.5       | 125 ± 18          | 5.3 ± 1.0        | 96.4 ± 3.5                        | 100.6 ± 8.2       | 43.8 ± 2.8        | 245 ± 12        |
| FA23      | A | 123 ± 14                         | 120 ± 16          | 120.6 ± 9.2       | 114.6 ± 3.6       | 124 ± 19          | < 5.6            | 97.9 ± 3.4                        | 102.9 ± 8.3       | 44.0 ± 2.7        | 258 ± 13        |
|           | B | 76.8 ± 9.0                       | 75 ± 10           | 71.7 ± 5.6        | 67.0 ± 2.6        | 81 ± 12           | < 3.8            | 51.2 ± 2.4                        | 53.7 ± 4.4        | 23.4 ± 1.6        | 461 ± 21        |
| FA24      | A | 69.6 ± 8.3                       | 80 ± 10           | 70.9 ± 5.5        | 66.3 ± 2.4        | 75 ± 11           | < 3.6            | 50.4 ± 2.1                        | 52.7 ± 4.3        | 23.5 ± 1.6        | 445 ± 20        |
|           | B | 123 ± 15                         | 96 ± 16           | 112.5 ± 8.6       | 107.2 ± 3.6       | 101 ± 16          | < 6.6            | 71.4 ± 2.7                        | 76.5 ± 6.2        | 34.0 ± 2.2        | 555 ± 25        |
| FA25      | A | 118 ± 13                         | 102 ± 14          | 114.2 ± 8.8       | 103.7 ± 3.7       | 118 ± 18          | 4.8 ± 1.2        | 74.0 ± 2.9                        | 77.1 ± 6.3        | 34.3 ± 2.3        | 547 ± 25        |
|           | B | 185 ± 20                         | 135 ± 19          | 144 ± 11          | 134.1 ± 4.1       | 222 ± 32          | 6.31 ± 0.74      | 95.7 ± 3.5                        | 101.2 ± 8.2       | 41.8 ± 2.6        | 409 ± 19        |
| FA26      | A | 177 ± 19                         | 139 ± 19          | 151 ± 12          | 143.6 ± 4.3       | 232 ± 34          | < 4.7            | 95.4 ± 3.3                        | 105.0 ± 8.5       | 43.5 ± 2.7        | 418 ± 19        |
|           | B |                                  |                   |                   |                   |                   |                  |                                   |                   |                   |                 |

Uncertainties are expressed for a coverage factor of k=2.

**Table S6.** Activity concentration for the gamma emitters in the naturally occurring  $^{238}\text{U}$ ,  $^{235}\text{U}$ ,  $^{232}\text{Th}$  and  $^{40}\text{K}$  series in Slags.

| Series |   | <sup>238</sup> U Radiative Serie |                   |                   |                   |                   | <sup>235</sup> U | <sup>232</sup> Th Radiative Serie |                   |                   | <sup>40</sup> K |
|--------|---|----------------------------------|-------------------|-------------------|-------------------|-------------------|------------------|-----------------------------------|-------------------|-------------------|-----------------|
| Slags  |   | <sup>234</sup> Th                | <sup>226</sup> Ra | <sup>214</sup> Pb | <sup>214</sup> Bi | <sup>210</sup> Pb |                  | <sup>228</sup> Ac                 | <sup>212</sup> Pb | <sup>208</sup> Tl |                 |
| S6     | A | 133 ± 15                         | 92 ± 16           | 125 ± 10          | 117.9 ± 3.7       | < 13.0            | < 4.8            | 46.0 ± 1.8                        | 49.2 ± 4.0        | 20.0 ± 1.3        | 59.6 ± 5.0      |
|        | B | 121 ± 13                         | 94 ± 13           | 108.9 ± 8.3       | 95.4 ± 2.9        | < 12.2            | 5.2 ± 1.0        | 38.0 ± 1.4                        | 43.4 ± 3.5        | 17.9 ± 1.1        | 46.8 ± 3.1      |
| S7     | A | 70.8 ± 8.7                       | 70 ± 10           | 67.2 ± 5.1        | 58.6 ± 2.0        | 23.3 ± 5.1        | < 3.7            | 28.5 ± 1.2                        | 30.6 ± 2.5        | 12.35 ± 0.76      | 176.3 ± 8.9     |
|        | B | 68.1 ± 8.6                       | 70 ± 11           | 66.0 ± 5.1        | 58.2 ± 2.1        | 23.8 ± 5.4        | 4.7 ± 1.3        | 27.5 ± 1.3                        | 30.4 ± 2.5        | 11.79 ± 0.81      | 180.4 ± 9.3     |
| S8     | A | 61.5 ± 8.0                       | 59.6 ± 9.4        | 59.9 ± 4.7        | 55.1 ± 2.4        | 38.2 ± 6.9        | < 4.1            | 42.0 ± 2.3                        | 44.6 ± 3.6        | 18.1 ± 1.3        | 183 ± 11        |
|        | B | 55.5 ± 7.4                       | 58.3 ± 9.3        | 53.8 ± 4.1        | 48.0 ± 1.8        | 30.7 ± 5.8        | < 3.6            | 38.2 ± 1.6                        | 40.5 ± 3.3        | 16.7 ± 1.1        | 163.4 ± 8.5     |
| S9     | A | < 5.0                            | < 5.9             | < 1.0             | < 1.1             | < 4.7             | < 1.8            | < 1.4                             | 1.02 ± 0.11       | 0.378 ± 0.053     | 3.28 ± 0.65     |
|        | B | < 5.4                            | 6.5 ± 2.6         | < 1.2             | < 1.0             | < 5.1             | < 1.9            | < 1.5                             | 1.09 ± 0.25       | < 0.4             | < 4.4           |
| S10    | A | 292 ± 32                         | 249 ± 34          | 283 ± 22          | 265.1 ± 7.9       | 137 ± 21          | 12.6 ± 5.1       | 85.8 ± 3.2                        | 92.4 ± 7.5        | 38.6 ± 2.4        | 37.1 ± 6.5      |
|        | B | 299 ± 32                         | 232 ± 31          | 274 ± 21          | 257.4 ± 7.7       | 147 ± 22          | 8.2 ± 1.5        | 82.9 ± 3.5                        | 90.0 ± 7.3        | 27.9 ± 1.8        | 30.8 ± 6.1      |
| S11    | A | 28.0 ± 4.1                       | 16.8 ± 4.5        | 16.7 ± 1.3        | 13.65 ± 0.62      | < 6.7             | < 2.0            | 4.81 ± 0.33                       | 5.95 ± 0.50       | 2.33 ± 0.19       | < 4.8           |
|        | B | 28.5 ± 3.4                       | 22.1 ± 3.7        | 19.4 ± 1.6        | 17.77 ± 0.86      | < 4.5             | < 1.6            | 5.89 ± 0.32                       | 6.55 ± 0.59       | 2.73 ± 0.26       | < 2.8           |
| S12    | A | 107 ± 13                         | 119 ± 16          | 116.4 ± 8.9       | 107.5 ± 3.5       | 52.6 ± 9.0        | < 6.2            | 33.1 ± 1.4                        | 37.3 ± 3.0        | 15.9 ± 1.1        | 41.3 ± 4.8      |
|        | B | 114 ± 12                         | 108 ± 13          | 114.4 ± 8.7       | 107.6 ± 3.3       | 50.0 ± 7.8        | 4.67 ± 0.57      | 34.1 ± 1.4                        | 36.3 ± 3.0        | 11.09 ± 0.74      | 49.5 ± 3.8      |
| S13    | A | 110 ± 12                         | 99 ± 14           | 103.3 ± 7.9       | 95.3 ± 3.0        | 39.2 ± 7.3        | < 3.7            | 29.1 ± 1.2                        | 30.7 ± 2.5        | 13.76 ± 0.93      | 108.4 ± 6.0     |
|        | B | 99 ± 11                          | 87 ± 12           | 94.9 ± 7.3        | 86.9 ± 3.0        | 34.3 ± 6.5        | 3.85 ± 0.67      | 26.7 ± 1.6                        | 29.1 ± 2.4        | 12.8 ± 1.0        | 106.4 ± 6.5     |
| S14    | A | 138 ± 16                         | 146 ± 19          | 146 ± 11          | 139.8 ± 4.5       | < 17.3            | < 7.2            | 59.0 ± 2.3                        | 62.7 ± 5.1        | 27.5 ± 1.8        | 121.7 ± 8.0     |
|        | B | 150 ± 17                         | 131 ± 17          | 144 ± 11          | 133.7 ± 4.3       | 15.2 ± 4.9        | < 3.0            | 58.5 ± 2.6                        | 62.7 ± 5.1        | 27.6 ± 1.8        | 116.3 ± 7.6     |
| S15    | A | 132 ± 15                         | 141 ± 17          | 121.1 ± 9.2       | 115.9 ± 3.5       | 32.0 ± 6.5        | < 3.9            | 38.7 ± 1.5                        | 40.1 ± 3.3        | 15.6 ± 1.0        | 30.2 ± 3.5      |
|        | B | 129 ± 14                         | 109 ± 14          | 107.7 ± 8.2       | 95.0 ± 2.8        | 30.2 ± 6.2        | 4.63 ± 0.88      | 32.3 ± 1.2                        | 35.1 ± 2.8        | 13.96 ± 0.88      | 26.8 ± 2.1      |
| S16    | A | 103 ± 11                         | 102 ± 12          | 109.5 ± 8.3       | 101.6 ± 3.0       | < 8.5             | 4.92 ± 0.80      | 50.5 ± 1.8                        | 52.3 ± 4.2        | 21.0 ± 1.3        | 40.8 ± 3.2      |
|        | B | 104 ± 12                         | 105 ± 13          | 109.7 ± 8.3       | 104.2 ± 3.1       | < 11.5            | < 3.5            | 49.7 ± 1.8                        | 52.5 ± 4.2        | 20.8 ± 1.3        | 40.7 ± 3.2      |
| S17    | A | 33.3 ± 4.8                       | 37.0 ± 6.3        | 31.7 ± 2.6        | 27.9 ± 1.2        | < 9.4             | < 3.0            | 17.9 ± 1.3                        | 17.9 ± 1.6        | 7.17 ± 0.64       | 20.7 ± 3.5      |
|        | B | 34.6 ± 5.6                       | 17.0 ± 6.8        | 22.6 ± 1.8        | 22.8 ± 1.0        | < 13.6            | < 3.9            | 11.73 ± 0.70                      | 12.6 ± 1.0        | 5.32 ± 0.44       | 28.1 ± 3.0      |

Uncertainties are expressed for a coverage factor of k=2.

**Table S7.** Activity concentration for the gamma emitters in the naturally occurring  $^{238}\text{U}$ ,  $^{235}\text{U}$ ,  $^{232}\text{Th}$  and  $^{40}\text{K}$  series, including  $^{241}\text{Am}$ , in Slags.

| Series    |          |   | $^{238}\text{U}$ Radiactive Serie |                   |                   |                   |                   | $^{235}\text{U}$ | $^{232}\text{Th}$ Radiactive Serie |                   |                   | $^{40}\text{K}$ | $^{241}\text{Am}$ |
|-----------|----------|---|-----------------------------------|-------------------|-------------------|-------------------|-------------------|------------------|------------------------------------|-------------------|-------------------|-----------------|-------------------|
| Slags     |          |   | $^{234}\text{Th}$                 | $^{226}\text{Ra}$ | $^{214}\text{Pb}$ | $^{214}\text{Bi}$ | $^{210}\text{Pb}$ |                  | $^{228}\text{Ac}$                  | $^{212}\text{Pb}$ | $^{208}\text{Tl}$ |                 |                   |
| <b>S3</b> | Vitreous | A | 44 ± 12                           | 34 ± 11           | 39.1 ± 6.1        | 37.6 ± 2.8        | 30 ± 10           | 2.23 ± 0.61      | 62.5 ± 4.6                         | 64 ± 10           | 23.8 ± 3.0        | 846 ± 73        | 3.26 ± 0.38       |
|           | Slag     | B | 35.3 ± 7.4                        | 31.7 ± 7.8        | 32.7 ± 5.0        | 29.4 ± 1.9        | 26.5 ± 8.3        | -                | 52.0 ± 3.5                         | 53.6 ± 8.7        | 19.6 ± 2.4        | 632 ± 54        | 3.15 ± 0.35       |
| <b>S4</b> | Steel    | A | 20.5 ± 5.3                        | 22.6 ± 8.1        | 16.1 ± 2.6        | 15.0 ± 1.4        | -                 | -                | 5.11 ± 0.61                        | 5.7 ± 1.0         | 14.3 ± 2.9        | -               | 4.06 ± 0.43       |
|           | Slag     | B | 15.3 ± 3.7                        | 23.2 ± 5.0        | 17.8 ± 2.8        | 16.6 ± 1.5        | -                 | -                | 5.53 ± 0.83                        | 5.5 ± 1.0         | 49.4 ± 6.5        | 4.0 ± 2.9       | 3.77 ± 0.42       |

Uncertainties are expressed for a coverage factor of k=2.

**Table S8.** Chemical composition (wt. %) of the analysed Cements, Fly Ashe and Slag used for the models validations.

|                                         | $\text{SiO}_2$ | $\text{CaO}$ | $\text{Al}_2\text{O}_3$ | $\text{Fe}_2\text{O}_3$ | $\text{MgO}$ | $\text{MnO}$ | $\text{Na}_2\text{O}$ | $\text{K}_2\text{O}$ | $\text{TiO}_2$ | $\text{SO}_3$ | Lol*  |
|-----------------------------------------|----------------|--------------|-------------------------|-------------------------|--------------|--------------|-----------------------|----------------------|----------------|---------------|-------|
| <b>OPC – CEM I 42.5 R</b>               | 20.00          | 62.90        | 4.20                    | 4.00                    | 1.20         | 0.00         | 0.00                  | 0.80                 | 0.20           | 2.62          | 3.40  |
| <b>White Cement – BL I 52.5 R</b>       | 19.66          | 68.25        | 4.65                    | 0.25                    | 1.02         | 0.00         | 0.00                  | 0.72                 | 0.07           | 2.67          | 2.62  |
| <b>White Cement – BL II/B-LL 42.5 R</b> | 15.94          | 65.06        | 3.84                    | 0.22                    | 0.56         | 0.00         | 0.00                  | 0.41                 | 0.08           | 2.52          | 11.29 |
| <b>CAC</b>                              | 3.42           | 35.66        | 41.38                   | 15.41                   | 0.65         | 0.00         | 0.00                  | 0.05                 | 1.91           | 0.01          | 2.01  |
| <b>CAC</b>                              | 3.42           | 35.66        | 41.38                   | 15.41                   | 0.65         | 0.00         | 0.00                  | 0.05                 | 1.91           | 0.01          | 2.01  |
| <b>Fly Ash</b>                          | 52.86          | 3.70         | 22.07                   | 8.21                    | 2.28         | 0.07         | 1.15                  | 2.53                 | 1.04           | 0.10          | 4.92  |
| <b>Slag</b>                             | 34.46          | 42.08        | 11.47                   | 0.61                    | 8.10         | 0.27         | 0.00                  | 0.45                 | 0.80           | 1.68          | 0.00  |

\*Lol: Lost on Ignition

**Table S9.** Experimental Activity concentration for the gamma emitters in the naturally occurring  $^{238}\text{U}$ ,  $^{235}\text{U}$ ,  $^{232}\text{Th}$  and  $^{40}\text{K}$  series, in Cements, Fly Ash and Slag used for the models validations.

| Series                            | $^{238}\text{U}$ Radiactive Serie |                   |                   |                   |                   | $^{235}\text{U}$ | $^{232}\text{Th}$ Radiactive Serie |                   |                   | $^{40}\text{K}$ |
|-----------------------------------|-----------------------------------|-------------------|-------------------|-------------------|-------------------|------------------|------------------------------------|-------------------|-------------------|-----------------|
|                                   | $^{234}\text{Th}$                 | $^{226}\text{Ra}$ | $^{214}\text{Pb}$ | $^{214}\text{Bi}$ | $^{210}\text{Pb}$ |                  | $^{228}\text{Ac}$                  | $^{212}\text{Pb}$ | $^{208}\text{Tl}$ |                 |
| OPC                               |                                   |                   |                   |                   |                   |                  |                                    |                   |                   |                 |
| CEM I 42.5 R                      | 31.5 ± 4.7                        | 31.6 ± 5.9        | 31.5 ± 2.5        | 30.1 ± 1.3        | 35.3 ± 6.2        | < 4.2            | 16.59 ± 0.88                       | 16.3 ± 1.3        | 6.03 ± 0.48       | 210 ± 10        |
| White Cement<br>BL I 52.5 R       | 30.4 ± 3.0                        | 36.3 ± 4.6        | 32.0 ± 1.3        | 31.30 ± 0.78      | 35.4 ± 3.5        | < 5.7            | 13.02 ± 0.57                       | 10.84 ± 0.47      | 19.0 ± 1.1        | 220.8 ± 5.7     |
| White Cement<br>BL II/B-LL 42.5 R | 25.3 ± 2.4                        | 23.4 ± 3.2        | 23.19 ± 0.91      | 20.01 ± 0.43      | 33.4 ± 3.4        | < 3.1            | 6.21 ± 0.23                        | 8.54 ± 0.35       | 14.61 ± 0.58      | 94.5 ± 2.5      |
| CAC                               | 70.7 ± 3.9                        | 70.6 ± 4.3        | 72.3 ± 2.7        | 69.2 ± 1.0        | 37.2 ± 3.0        | 2.69 ± 0.25      | 140.8 ± 2.3                        | 146.7 ± 5.9       | 52.3 ± 1.6        | < 3.0           |
| CAC                               | 63.7 ± 3.6                        | 63.7 ± 4.0        | 58.7 ± 2.2        | 60.57 ± 0.86      | 29.7 ± 2.5        | < 1.3            | 124.0 ± 2.0                        | 110.8 ± 4.5       | 45.5 ± 1.4        | < 4.2           |
| Fly Ash                           | 89.6 ± 4.9                        | 91.2 ± 5.4        | 86.4 ± 3.3        | 86.6 ± 1.2        | 87.9 ± 6.5        | < 1.5            | 64.1 ± 1.1                         | 57.5 ± 2.3        | 23.02 ± 0.70      | 438.9 ± 9.4     |
| Slag                              | 115.6 ± 6.1                       | 112.0 ± 6.6       | 120.6 ± 4.6       | 113.8 ± 1.7       | 18.9 ± 1.7        | 4.02 ± 0.22      | 43.56 ± 0.79                       | 44.7 ± 1.8        | 16.44 ± 0.52      | 119.0 ± 2.8     |

Uncertainties are expressed for a coverage factor of k=2.

## Annex 2

Collinearity in a multiple linear regression model is a common statistical problem that occurs when one or more independent variables in the model are a linear combination of one another, that is, there is a relationship between them.

A correlation matrix was used to determine the relationship between the independent variables (composition, wt.%) of cement, fly ash, and slag (A2.1, A2.2 and A2.3 Tables). The correlation between two variables is higher the closer their absolute values are near to 1.

**Table S10.** Correlation matrix between independent variables (wt. %) for Cements.

|                                | SiO <sub>2</sub> | CaO   | Al <sub>2</sub> O <sub>3</sub> | Fe <sub>2</sub> O <sub>3</sub> | MgO   | MnO   | Na <sub>2</sub> O | K <sub>2</sub> O | TiO <sub>2</sub> | SO <sub>3</sub> |
|--------------------------------|------------------|-------|--------------------------------|--------------------------------|-------|-------|-------------------|------------------|------------------|-----------------|
| SiO <sub>2</sub>               | 1.00             |       |                                |                                |       |       |                   |                  |                  |                 |
| CaO                            | 0.18             | 1.00  |                                |                                |       |       |                   |                  |                  |                 |
| Al <sub>2</sub> O <sub>3</sub> | -0.71            | -0.81 | 1.00                           |                                |       |       |                   |                  |                  |                 |
| Fe <sub>2</sub> O <sub>3</sub> | -0.62            | -0.73 | 0.92                           | 1.00                           |       |       |                   |                  |                  |                 |
| MgO                            | 0.34             | -0.09 | -0.24                          | -0.43                          | 1.00  |       |                   |                  |                  |                 |
| MnO                            | 0.04             | 0.22  | -0.16                          | -0.22                          | 0.18  | 1.00  |                   |                  |                  |                 |
| Na <sub>2</sub> O              | 0.51             | -0.37 | -0.07                          | -0.21                          | 0.64  | 0.49  | 1.00              |                  |                  |                 |
| K <sub>2</sub> O               | 0.91             | 0.00  | -0.54                          | -0.51                          | 0.36  | -0.11 | 0.55              | 1.00             |                  |                 |
| TiO <sub>2</sub>               | -0.58            | -0.80 | 0.94                           | 0.97                           | -0.32 | -0.21 | -0.11             | -0.44            | 1.00             |                 |
| SO <sub>3</sub>                | 0.11             | 0.05  | -0.23                          | -0.53                          | 0.72  | 0.06  | 0.37              | 0.17             | -0.44            | 1.00            |

**Table S11.** Correlation matrix between independent variables (wt. %) for Fly Ashes.

|                                | SiO <sub>2</sub> | CaO   | Al <sub>2</sub> O <sub>3</sub> | Fe <sub>2</sub> O <sub>3</sub> | MgO   | MnO   | Na <sub>2</sub> O | K <sub>2</sub> O | TiO <sub>2</sub> | SO <sub>3</sub> |
|--------------------------------|------------------|-------|--------------------------------|--------------------------------|-------|-------|-------------------|------------------|------------------|-----------------|
| SiO <sub>2</sub>               | 1.00             |       |                                |                                |       |       |                   |                  |                  |                 |
| CaO                            | -0.43            | 1.00  |                                |                                |       |       |                   |                  |                  |                 |
| Al <sub>2</sub> O <sub>3</sub> | -0.22            | -0.44 | 1.00                           |                                |       |       |                   |                  |                  |                 |
| Fe <sub>2</sub> O <sub>3</sub> | -0.56            | 0.11  | -0.27                          | 1.00                           |       |       |                   |                  |                  |                 |
| MgO                            | -0.09            | 0.51  | -0.67                          | 0.01                           | 1.00  |       |                   |                  |                  |                 |
| MnO                            | 0.11             | 0.51  | -0.20                          | -0.08                          | -0.12 | 1.00  |                   |                  |                  |                 |
| Na <sub>2</sub> O              | 0.21             | 0.49  | -0.47                          | -0.31                          | 0.51  | 0.43  | 1.00              |                  |                  |                 |
| K <sub>2</sub> O               | 0.54             | -0.13 | -0.45                          | -0.10                          | 0.21  | -0.02 | 0.24              | 1.00             |                  |                 |
| TiO <sub>2</sub>               | -0.13            | -0.19 | 0.51                           | -0.27                          | -0.29 | -0.17 | -0.57             | -0.41            | 1.00             |                 |
| SO <sub>3</sub>                | -0.20            | 0.28  | -0.01                          | 0.27                           | -0.23 | 0.60  | 0.06              | -0.27            | 0.03             | 1.00            |

**Table S12.** Correlation matrix between independent variables (wt. %) for Slags.

|                                | SiO <sub>2</sub> | Al <sub>2</sub> O <sub>3</sub> | CaO   | MgO   | Na <sub>2</sub> O | K <sub>2</sub> O | TiO <sub>2</sub> |
|--------------------------------|------------------|--------------------------------|-------|-------|-------------------|------------------|------------------|
| SiO <sub>2</sub>               | 1.00             |                                |       |       |                   |                  |                  |
| Al <sub>2</sub> O <sub>3</sub> | -0.29            | 1.00                           |       |       |                   |                  |                  |
| CaO                            | -0.59            | 0.10                           | 1.00  |       |                   |                  |                  |
| MgO                            | 0.41             | -0.75                          | -0.23 | 1.00  |                   |                  |                  |
| Na <sub>2</sub> O              | 0.12             | 0.16                           | -0.16 | -0.30 | 1.00              |                  |                  |
| K <sub>2</sub> O               | 0.25             | 0.59                           | -0.25 | -0.55 | 0.66              | 1.00             |                  |
| TiO <sub>2</sub>               | -0.11            | 0.13                           | 0.53  | -0.24 | -0.17             | 0.01             | 1.00             |



Due to the collinearity issues that arise from introducing each and every variable when constructing the linear regression models in this work, we chose the backward stepwise regression methodology, in which a model is obtained by iteratively discarding the variables with values of  $\alpha > 0.05$  until a model with independent variables with P-values less than 0.05 is obtained.

After obtaining the multiple linear regression models for  $^{226}\text{Ra}$ ,  $^{232}\text{Th}$  ( $^{212}\text{Pb}$ ), and  $^{40}\text{K}$  for cements, fly ash, and slag, the impact of collinearity in the variables maintained in each of the models was investigated. The variance inflation factor (VIF) (A2.4), was calculated to quantify the intensity of the variables collinearity, using the following expression:

$$VIF = \frac{1}{1 - R_i^2}$$

Where  $R_i^2$  is the auxiliary coefficient of determination for each independent variable maintained in each model.

**Table S13.** Calculated VIF for the variables in the  $^{226}\text{Ra}$ ,  $^{232}\text{Th}$  ( $^{212}\text{Pb}$ ) and  $^{40}\text{K}$  models for cements, Fly Ash and Slags.

| Cements           |                |                         |              |                |  | Fly Ash (FA)      |                         |                         |              |                | Slag (S)          |                       |                      |                |
|-------------------|----------------|-------------------------|--------------|----------------|--|-------------------|-------------------------|-------------------------|--------------|----------------|-------------------|-----------------------|----------------------|----------------|
| $^{226}\text{Ra}$ | $\text{SiO}_2$ | $\text{Fe}_2\text{O}_3$ | $\text{MnO}$ | $\text{TiO}_2$ |  | $^{226}\text{Ra}$ | $\text{Al}_2\text{O}_3$ | $\text{Fe}_2\text{O}_3$ | $\text{MgO}$ | $\text{TiO}_2$ | $^{226}\text{Ra}$ | $\text{Na}_2\text{O}$ | $\text{K}_2\text{O}$ | $\text{TiO}_2$ |
| $R_i^2$           | 0.33           | 0.97                    | 0.10         | 0.97           |  | $R_i^2$           | 0.93                    | 0.63                    | 0.64         | 0.92           | $R_i^2$           | 0.54                  | 0.70                 | 0.46           |
| VIF               | 1.50           | 35.55                   | 1.11         | 33.60          |  | VIF               | 13.42                   | 2.67                    | 2.80         | 13.23          | VIF               | 2.18                  | 3.39                 | 1.87           |

  

|                   |              |                         |              |                      |                |               |                   |              |                         |                         |              |                   |              |                       |                      |
|-------------------|--------------|-------------------------|--------------|----------------------|----------------|---------------|-------------------|--------------|-------------------------|-------------------------|--------------|-------------------|--------------|-----------------------|----------------------|
| $^{212}\text{Pb}$ | $\text{CaO}$ | $\text{Al}_2\text{O}_3$ | $\text{MgO}$ | $\text{K}_2\text{O}$ | $\text{TiO}_2$ | $\text{SO}_3$ | $^{212}\text{Pb}$ | $\text{CaO}$ | $\text{Al}_2\text{O}_3$ | $\text{Fe}_2\text{O}_3$ | $\text{MgO}$ | $^{212}\text{Pb}$ | $\text{CaO}$ | $\text{Na}_2\text{O}$ | $\text{K}_2\text{O}$ |
| $R_i^2$           | 0.77         | 0.97                    | 0.91         | 0.77                 | 0.97           | 0.86          | $R_i^2$           | 0.80         | 0.68                    | 0.64                    | 0.78         | $R_i^2$           | 0.43         | 0.51                  | 0.67                 |
| VIF               | 4.31         | 34.25                   | 11.45        | 4.38                 | 34.96          | 7.00          | VIF               | 4.91         | 3.16                    | 2.77                    | 4.53         | VIF               | 1.76         | 2.04                  | 3.06                 |

  

|                 |                |              |                         |                       |                      |                |                 |                      |                |                 |                |              |              |                |
|-----------------|----------------|--------------|-------------------------|-----------------------|----------------------|----------------|-----------------|----------------------|----------------|-----------------|----------------|--------------|--------------|----------------|
| $^{40}\text{K}$ | $\text{SiO}_2$ | $\text{CaO}$ | $\text{Al}_2\text{O}_3$ | $\text{Na}_2\text{O}$ | $\text{K}_2\text{O}$ | $\text{TiO}_2$ | $^{40}\text{K}$ | $\text{K}_2\text{O}$ | $\text{TiO}_2$ | $^{40}\text{K}$ | $\text{SiO}_2$ | $\text{CaO}$ | $\text{MgO}$ | $\text{TiO}_2$ |
| $R_i^2$         | 0.98           | 0.93         | 0.97                    | 0.73                  | 0.96                 | 0.96           | $R_i^2$         | 0.66                 | 0.66           | $R_i^2$         | 0.88           | 0.88         | 0.83         | 0.84           |
| VIF             | 52.37          | 13.56        | 30.45                   | 3.69                  | 23.08                | 25.48          | VIF             | 2.99                 | 2.99           | VIF             | 8.51           | 8.10         | 6.01         | 6.37           |

According to Kleinbaum et al., [87], VIF values greater than 10 indicate collinearity issues that are aggravated depending on the magnitude of this value. Collinearity has been minimised in the current work using the backward stepwise regression model, which has very little impact on our models because these variables are vector-correlated, as shown in the HJ-Biplot plots in the manuscript.
